# Supplementary material for: Roles of Nutrient Limitation on Western Lake Erie CyanoHAB Toxin Production
Source: PubMed Central journal article supplement (PMC7828104; doi:10.3390/toxins13010047), 2021-01-09
Supplement: toxins-13-00047-s001.pdf [file toxins-13-00047-s001.pdf]

## Supplementary Materials: Roles of nutrient limitation on Western Lake Erie CyanoHAB toxin production

**Malcolm A. Barnard, Justin D. Chaffin, Haley E. Plaas, Gregory L. Boyer, Bofan Wei, Steven W. Wilhelm, Karen L. Rossignol, Jeremy S. Braddy, George S. Bullerjahn, Thomas B. Bridgeman, Timothy W. Davis, Jin Wei, Minsheng Bu, and Hans W. Paerl**

Corresponding Authors: M.A. Barnard (malcolm.barnard@unc.edu) and H.W. Paerl (hans\_paerl@unc.edu)

### Table of Contents

|                                                                                              |     |
|----------------------------------------------------------------------------------------------|-----|
| <b>Table S1.</b> Chlorophyll a data from the experiment. ....                                | S2  |
| <b>Table S2.</b> Chlorophyll a production rates.....                                         | S5  |
| <b>Table S3.</b> Microcystin data from the experiment.....                                   | S7  |
| <b>Table S4.</b> Biomass-normalized microcystin data from the experiment.....                | S9  |
| <b>Table S5.</b> Microcystin production rates.....                                           | S11 |
| <b>Table S6.</b> Biomass-normalized microcystin production rates.....                        | S12 |
| <b>Table S7.</b> Anatoxin data from the experiment. ....                                     | S13 |
| <b>Table S8.</b> Biomass-normalized anatoxin data from the experiment. ....                  | S15 |
| <b>Table S9.</b> Anatoxin production rates. ....                                             | S17 |
| <b>Table S10.</b> Biomass-normalized anatoxin production rates.....                          | S18 |
| <b>Table S11.</b> GPS coordinates of the sampling locations and incubation.....              | S20 |
| <b>Table S12.</b> Compounds compromising the major ion solution used in this experiment..... | S20 |

Table S1. Chlorophyll a data from the experiment.

| Sampling Period | Bay      | Treatment       | T0 ( $\mu\text{g L}^{-1}$ chl) |            | T1 ( $\mu\text{g L}^{-1}$ chl) |            | T2 ( $\mu\text{g L}^{-1}$ chl) |             | T3 ( $\mu\text{g L}^{-1}$ chl) |            |
|-----------------|----------|-----------------|--------------------------------|------------|--------------------------------|------------|--------------------------------|-------------|--------------------------------|------------|
| June 2019       | Maumee   | No Dilution     | 12.48                          | $\pm$ 2.91 | 31.78                          | $\pm$ 2.92 | 83.56                          | $\pm$ 7.93  | 49.58                          | $\pm$ 9.11 |
|                 | Bay      | Control         | n                              | = 3        | n                              | = 3        | n                              | = 3         | n                              | = 3        |
| June 2019       | Maumee   | No Dilution     | 12.16                          | $\pm$ 0.85 | 34.58                          | $\pm$ 2.66 | 81.48                          | $\pm$ 8.15  | 47.78                          | $\pm$ 7.98 |
|                 | Bay      | NO <sub>3</sub> | n                              | = 3        | n                              | = 3        | n                              | = 3         | n                              | = 3        |
| June 2019       | Maumee   | No Dilution     | 11.54                          | $\pm$ 0.45 | 30.92                          | $\pm$ 3.17 | 80.46                          | $\pm$ 9.88  | 58.34                          | $\pm$ 7.85 |
|                 | Bay      | NH <sub>4</sub> | n                              | = 3        | n                              | = 3        | n                              | = 3         | n                              | = 3        |
| June 2019       | Maumee   | No Dilution     | 12.35                          | $\pm$ 0.64 | 30.39                          | $\pm$ 2.46 | 105.97                         | $\pm$ 2.33  | 155.07                         | $\pm$ 8.64 |
|                 | Bay      | PO <sub>4</sub> | n                              | = 3        | n                              | = 3        | n                              | = 3         | n                              | = 3        |
| June 2019       | Maumee   | No Dilution     | 12.33                          | $\pm$ 1.49 | 36.36                          | $\pm$ 1.82 | 105.78                         | $\pm$ 12.88 | 169.75                         | $\pm$ 3.47 |
|                 | Bay      | N+P             | n                              | = 3        | n                              | = 3        | n                              | = 3         | n                              | = 3        |
| June 2019       | Maumee   | 40% Dilution    | 7.70                           | $\pm$ 0.56 | 21.63                          | $\pm$ 1.80 | 59.68                          | $\pm$ 16.04 | 40.52                          | $\pm$ 2.10 |
|                 | Bay      | Control         | n                              | = 3        | n                              | = 3        | n                              | = 3         | n                              | = 3        |
| June 2019       | Maumee   | 40% Dilution    | 7.41                           | $\pm$ 0.37 | 20.77                          | $\pm$ 3.27 | 33.97                          | $\pm$ 4.43  | 27.89                          | $\pm$ 3.83 |
|                 | Bay      | NO <sub>3</sub> | n                              | = 3        | n                              | = 3        | n                              | = 3         | n                              | = 3        |
| June 2019       | Maumee   | 40% Dilution    | 7.60                           | $\pm$ 0.23 | 21.09                          | $\pm$ 0.59 | 51.94                          | $\pm$ 1.58  | 37.55                          | $\pm$ 1.87 |
|                 | Bay      | NH <sub>4</sub> | n                              | = 3        | n                              | = 3        | n                              | = 3         | n                              | = 3        |
| June 2019       | Maumee   | 40% Dilution    | 7.69                           | $\pm$ 0.20 | 19.46                          | $\pm$ 0.98 | 67.41                          | $\pm$ 7.41  | 75.74                          | $\pm$ 3.37 |
|                 | Bay      | PO <sub>4</sub> | n                              | = 3        | n                              | = 3        | n                              | = 3         | n                              | = 3        |
| June 2019       | Maumee   | 40% Dilution    | 7.00                           | $\pm$ 0.80 | 20.18                          | $\pm$ 2.44 | 76.12                          | $\pm$ 4.40  | 91.89                          | $\pm$ 4.96 |
|                 | Bay      | N+P             | n                              | = 3        | n                              | = 3        | n                              | = 3         | n                              | = 3        |
| June 2019       | Sandusky | No Dilution     | 31.75                          | $\pm$ 0.56 | 30.29                          | $\pm$ 2.04 | 44.02                          | $\pm$ 3.55  | 66.68                          | $\pm$ 3.36 |
|                 | Bay      | Control         | n                              | = 3        | n                              | = 3        | n                              | = 3         | n                              | = 3        |
| June 2019       | Sandusky | No Dilution     | 31.40                          | $\pm$ 0.94 | 29.73                          | $\pm$ 0.92 | 40.76                          | $\pm$ 4.74  | 63.18                          | $\pm$ 3.40 |
|                 | Bay      | NO <sub>3</sub> | n                              | = 3        | n                              | = 3        | n                              | = 3         | n                              | = 3        |
| June 2019       | Sandusky | No Dilution     | 31.26                          | $\pm$ 1.40 | 31.60                          | $\pm$ 1.55 | 40.61                          | $\pm$ 2.63  | 64.25                          | $\pm$ 3.96 |
|                 | Bay      | NH <sub>4</sub> | n                              | = 3        | n                              | = 3        | n                              | = 3         | n                              | = 3        |
| June 2019       | Sandusky | No Dilution     | 31.26                          | $\pm$ 0.39 | 30.89                          | $\pm$ 1.30 | 43.62                          | $\pm$ 5.14  | 68.87                          | $\pm$ 8.57 |
|                 | Bay      | PO <sub>4</sub> | n                              | = 3        | n                              | = 3        | n                              | = 3         | n                              | = 3        |
| June 2019       | Sandusky | No Dilution     | 21.79                          | $\pm$ 1.24 | 19.69                          | $\pm$ 4.04 | 41.07                          | $\pm$ 2.22  | 74.52                          | $\pm$ 2.16 |
|                 | Bay      | N+P             | n                              | = 3        | n                              | = 3        | n                              | = 3         | n                              | = 3        |

| Sampling Period | Bay      | Treatment       | T0 ( $\mu\text{g L}^{-1}$ chl) |   |       | T1 ( $\mu\text{g L}^{-1}$ chl) |   |       | T2 ( $\mu\text{g L}^{-1}$ chl) |   |       | T3 ( $\mu\text{g L}^{-1}$ chl) |   |       |
|-----------------|----------|-----------------|--------------------------------|---|-------|--------------------------------|---|-------|--------------------------------|---|-------|--------------------------------|---|-------|
| June 2019       | Sandusky | 40% Dilution    | 18.04                          | ± | 0.65  | 17.75                          | ± | 0.89  | 22.25                          | ± | 1.75  | 33.18                          | ± | 2.63  |
|                 | Bay      | Control         | n                              | = | 3     | n                              | = | 3     | n                              | = | 3     | n                              | = | 3     |
| June 2019       | Sandusky | 40% Dilution    | 19.12                          | ± | 0.40  | 18.39                          | ± | 0.51  | 23.78                          | ± | 0.36  | 45.75                          | ± | 18.66 |
|                 | Bay      | NO <sub>3</sub> | n                              | = | 3     | n                              | = | 3     | n                              | = | 3     | n                              | = | 3     |
| June 2019       | Sandusky | 40% Dilution    | 17.31                          | ± | 1.12  | 17.32                          | ± | 1.01  | 23.41                          | ± | 2.85  | 33.64                          | ± | 3.36  |
|                 | Bay      | NH <sub>4</sub> | n                              | = | 3     | n                              | = | 3     | n                              | = | 3     | n                              | = | 3     |
| June 2019       | Sandusky | 40% Dilution    | 18.25                          | ± | 0.84  | 17.14                          | ± | 1.13  | 23.12                          | ± | 2.88  | 36.12                          | ± | 2.44  |
|                 | Bay      | PO <sub>4</sub> | n                              | = | 3     | n                              | = | 3     | n                              | = | 3     | n                              | = | 3     |
| June 2019       | Sandusky | 40% Dilution    | 19.11                          | ± | 0.35  | 18.59                          | ± | 1.00  | 22.77                          | ± | 1.10  | 35.23                          | ± | 2.92  |
|                 | Bay      | N+P             | n                              | = | 3     | n                              | = | 3     | n                              | = | 3     | n                              | = | 3     |
| August 2019     | Maumee   | No Dilution     | 428.40                         | ± | 35.47 | 331.03                         | ± | 18.83 | 215.08                         | ± | 31.47 | 97.00                          | ± | 14.83 |
|                 | Bay      | Control         | n                              | = | 3     | n                              | = | 3     | n                              | = | 3     | n                              | = | 3     |
| August 2019     | Maumee   | No Dilution     | 408.92                         | ± | 28.16 | 281.70                         | ± | 17.90 | 196.15                         | ± | 25.11 | 77.13                          | ± | 9.90  |
|                 | Bay      | NO <sub>3</sub> | n                              | = | 3     | n                              | = | 3     | n                              | = | 3     | n                              | = | 3     |
| August 2019     | Maumee   | No Dilution     | 390.22                         | ± | 41.66 | 345.26                         | ± | 36.80 | 200.58                         | ± | 44.67 | 85.50                          | ± | 17.12 |
|                 | Bay      | NH <sub>4</sub> | n                              | = | 3     | n                              | = | 3     | n                              | = | 3     | n                              | = | 3     |
| August 2019     | Maumee   | No Dilution     | 378.22                         | ± | 12.08 | 318.07                         | ± | 14.73 | 162.84                         | ± | 30.16 | 70.23                          | ± | 11.51 |
|                 | Bay      | Urea            | n                              | = | 3     | n                              | = | 3     | n                              | = | 3     | n                              | = | 3     |
| August 2019     | Maumee   | No Dilution     | 391.93                         | ± | 9.16  | 331.18                         | ± | 1.21  | 184.85                         | ± | 12.19 | 95.40                          | ± | 16.05 |
|                 | Bay      | PO <sub>4</sub> | n                              | = | 3     | n                              | = | 3     | n                              | = | 3     | n                              | = | 3     |
| August 2019     | Maumee   | No Dilution     | 390.88                         | ± | 11.18 | 354.75                         | ± | 15.11 | 217.65                         | ± | 11.40 | 107.31                         | ± | 9.99  |
|                 | Bay      | N+P             | n                              | = | 3     | n                              | = | 3     | n                              | = | 3     | n                              | = | 3     |
| August 2019     | Maumee   | 40% Dilution    | 228.64                         | ± | 8.69  | 250.21                         | ± | 27.78 | 166.43                         | ± | 16.72 | 107.50                         | ± | 7.89  |
|                 | Bay      | Control         | n                              | = | 3     | n                              | = | 3     | n                              | = | 3     | n                              | = | 3     |
| August 2019     | Maumee   | 40% Dilution    | 218.77                         | ± | 2.69  | 244.57                         | ± | 14.99 | 151.19                         | ± | 5.70  | 70.00                          | ± | 22.02 |
|                 | Bay      | NO <sub>3</sub> | n                              | = | 3     | n                              | = | 3     | n                              | = | 3     | n                              | = | 3     |
| August 2019     | Maumee   | 40% Dilution    | 233.67                         | ± | 2.71  | 224.01                         | ± | 20.44 | 168.98                         | ± | 6.94  | 87.46                          | ± | 5.52  |
|                 | Bay      | NH <sub>4</sub> | n                              | = | 3     | n                              | = | 3     | n                              | = | 3     | n                              | = | 3     |
| August 2019     | Maumee   | 40% Dilution    | 241.33                         | ± | 0.89  | 215.56                         | ± | 3.39  | 137.88                         | ± | 24.86 | 50.51                          | ± | 7.45  |
|                 | Bay      | Urea            | n                              | = | 3     | n                              | = | 3     | n                              | = | 3     | n                              | = | 3     |
| August 2019     | Maumee   | 40% Dilution    | 216.82                         | ± | 3.80  | 214.56                         | ± | 6.75  | 160.87                         | ± | 7.27  | 102.51                         | ± | 14.06 |
|                 | Bay      | PO <sub>4</sub> | n                              | = | 3     | n                              | = | 3     | n                              | = | 3     | n                              | = | 3     |

| Sampling Period | Bay      | Treatment       | T0 ( $\mu\text{g L}^{-1}$ chl) |            | T1 ( $\mu\text{g L}^{-1}$ chl) |             | T2 ( $\mu\text{g L}^{-1}$ chl) |             | T3 ( $\mu\text{g L}^{-1}$ chl) |             |
|-----------------|----------|-----------------|--------------------------------|------------|--------------------------------|-------------|--------------------------------|-------------|--------------------------------|-------------|
| August 2019     | Maumee   | 40% Dilution    | 235.67                         | $\pm$ 6.27 | 213.25                         | $\pm$ 9.67  | 143.30                         | $\pm$ 1.21  | 66.89                          | $\pm$ 17.30 |
|                 | Bay      | N+P             | n                              | = 3        | n                              | = 3         | n                              | = 3         | n                              | = 3         |
| August 2019     | Sandusky | No Dilution     | 63.81                          | $\pm$ 1.00 | 44.99                          | $\pm$ 1.32  | 32.69                          | $\pm$ 3.55  | 29.96                          | $\pm$ 3.20  |
|                 | Bay      | Control         | n                              | = 3        | n                              | = 3         | n                              | = 3         | n                              | = 3         |
| August 2019     | Sandusky | No Dilution     | 92.11                          | $\pm$ 2.29 | 113.46                         | $\pm$ 1.76  | 124.01                         | $\pm$ 7.72  | 137.10                         | $\pm$ 10.64 |
|                 | Bay      | NO <sub>3</sub> | n                              | = 3        | n                              | = 3         | n                              | = 3         | n                              | = 3         |
| August 2019     | Sandusky | No Dilution     | 85.46                          | $\pm$ 9.44 | 108.16                         | $\pm$ 3.09  | 117.84                         | $\pm$ 1.84  | 127.44                         | $\pm$ 4.86  |
|                 | Bay      | NH <sub>4</sub> | n                              | = 3        | n                              | = 3         | n                              | = 3         | n                              | = 3         |
| August 2019     | Sandusky | No Dilution     | 75.52                          | $\pm$ 2.85 | 108.91                         | $\pm$ 4.33  | 116.21                         | $\pm$ 3.21  | 126.68                         | $\pm$ 5.27  |
|                 | Bay      | Urea            | n                              | = 3        | n                              | = 3         | n                              | = 3         | n                              | = 3         |
| August 2019     | Sandusky | No Dilution     | 61.46                          | $\pm$ 1.27 | 43.44                          | $\pm$ 2.76  | 36.26                          | $\pm$ 3.06  | 36.59                          | $\pm$ 0.70  |
|                 | Bay      | PO <sub>4</sub> | n                              | = 3        | n                              | = 3         | n                              | = 3         | n                              | = 3         |
| August 2019     | Sandusky | No Dilution     | 77.78                          | $\pm$ 3.70 | 127.40                         | $\pm$ 5.05  | 155.39                         | $\pm$ 3.33  | 196.34                         | $\pm$ 3.19  |
|                 | Bay      | N+P             | n                              | = 3        | n                              | = 3         | n                              | = 3         | n                              | = 3         |
| August 2019     | Sandusky | 40% Dilution    | 46.10                          | $\pm$ 3.08 | 33.40                          | $\pm$ 1.32  | 63.16                          | $\pm$ 22.36 | 23.97                          | $\pm$ 4.53  |
|                 | Bay      | Control         | n                              | = 3        | n                              | = 3         | n                              | = 3         | n                              | = 3         |
| August 2019     | Sandusky | 40% Dilution    | 45.99                          | $\pm$ 1.89 | 72.12                          | $\pm$ 4.59  | 62.34                          | $\pm$ 30.16 | 87.07                          | $\pm$ 1.46  |
|                 | Bay      | NO <sub>3</sub> | n                              | = 2        | n                              | = 3         | n                              | = 3         | n                              | = 3         |
| August 2019     | Sandusky | 40% Dilution    | 46.07                          | $\pm$ 0.91 | 64.20                          | $\pm$ 11.87 | 68.68                          | $\pm$ 6.61  | 79.78                          | $\pm$ 4.33  |
|                 | Bay      | NH <sub>4</sub> | n                              | = 3        | n                              | = 3         | n                              | = 3         | n                              | = 3         |
| August 2019     | Sandusky | 40% Dilution    | 49.65                          | $\pm$ 2.78 | 70.26                          | $\pm$ 0.94  | 66.61                          | $\pm$ 9.37  | 86.86                          | $\pm$ 2.27  |
|                 | Bay      | Urea            | n                              | = 3        | n                              | = 3         | n                              | = 3         | n                              | = 3         |
| August 2019     | Sandusky | 40% Dilution    | 46.13                          | $\pm$ 3.11 | 30.82                          | $\pm$ 1.57  | 23.21                          | $\pm$ 1.86  | 25.62                          | $\pm$ 1.50  |
|                 | Bay      | PO <sub>4</sub> | n                              | = 3        | n                              | = 3         | n                              | = 3         | n                              | = 3         |
| August 2019     | Sandusky | 40% Dilution    | 46.84                          | $\pm$ 1.93 | 80.57                          | $\pm$ 6.88  | 160.05                         | $\pm$ 9.22  | 169.26                         | $\pm$ 2.78  |
|                 | Bay      | N+P             | n                              | = 3        | n                              | = 3         | n                              | = 3         | n                              | = 3         |

**Table S2.** Chlorophyll a production rates.

| Sampling Period | Bay          | Treatment                    | Production (d <sup>-1</sup> ) |   |      |
|-----------------|--------------|------------------------------|-------------------------------|---|------|
| June 2019       | Maumee Bay   | No Dilution Control          | 0.46                          | ± | 0.34 |
| June 2019       | Maumee Bay   | No Dilution NO <sub>3</sub>  | 0.46                          | ± | 0.19 |
| June 2019       | Maumee Bay   | No Dilution NH <sub>4</sub>  | 0.54                          | ± | 0.14 |
| June 2019       | Maumee Bay   | No Dilution PO <sub>4</sub>  | 0.84                          | ± | 0.08 |
| June 2019       | Maumee Bay   | No Dilution N+P              | 0.87                          | ± | 0.15 |
| June 2019       | Maumee Bay   | 40% Dilution Control         | 0.55                          | ± | 0.10 |
| June 2019       | Maumee Bay   | 40% Dilution NO <sub>3</sub> | 0.44                          | ± | 0.15 |
| June 2019       | Maumee Bay   | 40% Dilution NH <sub>4</sub> | 0.53                          | ± | 0.06 |
| June 2019       | Maumee Bay   | 40% Dilution PO <sub>4</sub> | 0.76                          | ± | 0.05 |
| June 2019       | Maumee Bay   | 40% Dilution N+P             | 0.86                          | ± | 0.15 |
| June 2019       | Sandusky Bay | No Dilution Control          | 0.25                          | ± | 0.05 |
| June 2019       | Sandusky Bay | No Dilution NO <sub>3</sub>  | 0.23                          | ± | 0.07 |
| June 2019       | Sandusky Bay | No Dilution NH <sub>4</sub>  | 0.25                          | ± | 0.08 |
| June 2019       | Sandusky Bay | No Dilution PO <sub>4</sub>  | 0.25                          | ± | 0.13 |
| June 2019       | Sandusky Bay | No Dilution N+P              | 0.30                          | ± | 0.06 |
| June 2019       | Sandusky Bay | 40% Dilution Control         | 0.21                          | ± | 0.09 |
| June 2019       | Sandusky Bay | 40% Dilution NO <sub>3</sub> | 0.30                          | ± | 0.41 |
| June 2019       | Sandusky Bay | 40% Dilution NH <sub>4</sub> | 0.20                          | ± | 0.12 |
| June 2019       | Sandusky Bay | 40% Dilution PO <sub>4</sub> | 0.24                          | ± | 0.09 |
| June 2019       | Sandusky Bay | 40% Dilution N+P             | 0.21                          | ± | 0.09 |
| August 2019     | Maumee Bay   | No Dilution Control          | -0.50                         | ± | 0.18 |
| August 2019     | Maumee Bay   | No Dilution NO <sub>3</sub>  | -0.56                         | ± | 0.15 |
| August 2019     | Maumee Bay   | No Dilution NH <sub>4</sub>  | -0.51                         | ± | 0.24 |
| August 2019     | Maumee Bay   | No Dilution Urea             | -0.56                         | ± | 0.17 |

| Sampling Period | Bay          | Treatment                       | Production (d <sup>-1</sup> ) |   |      |
|-----------------|--------------|---------------------------------|-------------------------------|---|------|
| August 2019     | Maumee Bay   | No Dilution<br>PO <sub>4</sub>  | -0.47                         | ± | 0.17 |
| August 2019     | Maumee Bay   | No Dilution<br>N+P              | -0.43                         | ± | 0.10 |
| August 2019     | Maumee Bay   | 40% Dilution<br>Control         | -0.25                         | ± | 0.09 |
| August 2019     | Maumee Bay   | 40% Dilution<br>NO <sub>3</sub> | -0.38                         | ± | 0.31 |
| August 2019     | Maumee Bay   | 40% Dilution<br>NH <sub>4</sub> | -0.33                         | ± | 0.06 |
| August 2019     | Maumee Bay   | 40% Dilution<br>Urea            | -0.52                         | ± | 0.15 |
| August 2019     | Maumee Bay   | 40% Dilution<br>PO <sub>4</sub> | -0.25                         | ± | 0.14 |
| August 2019     | Maumee Bay   | 40% Dilution<br>N+P             | -0.42                         | ± | 0.26 |
| August 2019     | Sandusky Bay | No Dilution<br>Control          | -0.25                         | ± | 0.11 |
| August 2019     | Sandusky Bay | No Dilution<br>NO <sub>3</sub>  | 0.13                          | ± | 0.08 |
| August 2019     | Sandusky Bay | No Dilution<br>NH <sub>4</sub>  | 0.13                          | ± | 0.14 |
| August 2019     | Sandusky Bay | No Dilution<br>Urea             | 0.17                          | ± | 0.06 |
| August 2019     | Sandusky Bay | No Dilution<br>PO <sub>4</sub>  | -0.17                         | ± | 0.03 |
| August 2019     | Sandusky Bay | No Dilution<br>N+P              | 0.31                          | ± | 0.06 |
| August 2019     | Sandusky Bay | 40% Dilution<br>Control         | -0.22                         | ± | 0.21 |
| August 2019     | Sandusky Bay | 40% Dilution<br>NO <sub>3</sub> | 0.21                          | ± | 0.05 |
| August 2019     | Sandusky Bay | 40% Dilution<br>NH <sub>4</sub> | 0.18                          | ± | 0.06 |
| August 2019     | Sandusky Bay | 40% Dilution<br>Urea            | 0.19                          | ± | 0.07 |
| August 2019     | Sandusky Bay | 40% Dilution<br>PO <sub>4</sub> | -0.20                         | ± | 0.10 |
| August 2019     | Sandusky Bay | 40% Dilution<br>N+P             | 0.43                          | ± | 0.05 |

Table S3. Microcystin data from the experiment.

| Sampling Period | Bay          | Treatment       | T0 ( $\mu\text{g L}^{-1}$ ) |   |      | T1 ( $\mu\text{g L}^{-1}$ ) |   |      | T2 ( $\mu\text{g L}^{-1}$ ) |   |      | T3 ( $\mu\text{g L}^{-1}$ ) |   |      |
|-----------------|--------------|-----------------|-----------------------------|---|------|-----------------------------|---|------|-----------------------------|---|------|-----------------------------|---|------|
| June 2019       | Sandusky Bay | No Dilution     | 0.14                        | ± | 0.03 | 0.17                        | ± | 0.02 | 0.20                        | ± | 0.05 | 0.29                        | ± | 0.05 |
|                 |              | Control         | n                           | = | 3    | n                           | = | 3    | n                           | = | 3    | n                           | = | 3    |
| June 2019       | Sandusky Bay | No Dilution     | 0.17                        | ± | 0.01 | 0.18                        | ± | 0.04 | 0.25                        | ± | 0.04 | 0.29                        | ± | 0.07 |
|                 |              | NO <sub>3</sub> | n                           | = | 2    | n                           | = | 3    | n                           | = | 3    | n                           | = | 3    |
| June 2019       | Sandusky Bay | No Dilution     | 0.18                        | ± | 0.01 | 0.19                        | ± | 0.03 | 0.23                        | ± | 0.02 | 0.29                        | ± | 0.03 |
|                 |              | NH <sub>4</sub> | n                           | = | 3    | n                           | = | 3    | n                           | = | 3    | n                           | = | 3    |
| June 2019       | Sandusky Bay | No Dilution     | 0.23                        | ± | 0.02 | 0.25                        | ± | 0.05 | 0.20                        | ± | 0.02 | 0.36                        | ± | 0.01 |
|                 |              | PO <sub>4</sub> | n                           | = | 3    | n                           | = | 3    | n                           | = | 3    | n                           | = | 3    |
| June 2019       | Sandusky Bay | No Dilution     | 0.20                        | ± | 0.04 | 0.19                        | ± | 0.03 | 0.23                        | ± | 0.02 | 0.35                        | ± | 0.04 |
|                 |              | N+P             | n                           | = | 2    | n                           | = | 3    | n                           | = | 3    | n                           | = | 3    |
| June 2019       | Sandusky Bay | 40% Dilution    | 0.14                        | ± | 0.02 | 0.13                        | ± | 0.06 | 0.12                        | ± | 0.01 | 0.15                        | ± | 0.06 |
|                 |              | Control         | n                           | = | 2    | n                           | = | 2    | n                           | = | 2    | n                           | = | 2    |
| June 2019       | Sandusky Bay | 40% Dilution    | 0.18                        | ± | 0.06 | 0.11                        | ± | 0.01 | 0.13                        | ± | 0.04 | 0.14                        | ± | 0.01 |
|                 |              | NO <sub>3</sub> | n                           | = | 2    | n                           | = | 3    | n                           | = | 3    | n                           | = | 2    |
| June 2019       | Sandusky Bay | 40% Dilution    | 0.14                        | ± | 0.00 | 0.12                        | ± | 0.03 | 0.15                        | ± | 0.03 | 0.12                        | ± | 0.05 |
|                 |              | NH <sub>4</sub> | n                           | = | 1    | n                           | = | 3    | n                           | = | 3    | n                           | = | 3    |
| June 2019       | Sandusky Bay | 40% Dilution    | 0.23                        | ± | 0.00 | 0.11                        | ± | 0.03 | 0.13                        | ± | 0.01 | 0.15                        | ± | 0.04 |
|                 |              | PO <sub>4</sub> | n                           | = | 1    | n                           | = | 3    | n                           | = | 2    | n                           | = | 2    |
| June 2019       | Sandusky Bay | 40% Dilution    | 0.16                        | ± | 0.00 | 0.14                        | ± | 0.02 | 0.14                        | ± | 0.03 | 0.13                        | ± | 0.01 |
|                 |              | N+P             | n                           | = | 1    | n                           | = | 3    | n                           | = | 3    | n                           | = | 3    |
| August 2019     | Maumee Bay   | No Dilution     | 18.06                       | ± | 1.10 | 14.91                       | ± | 1.28 | 9.39                        | ± | 3.27 | 2.79                        | ± | 1.13 |
|                 |              | Control         | n                           | = | 3    | n                           | = | 3    | n                           | = | 3    | n                           | = | 3    |
| August 2019     | Maumee Bay   | No Dilution     | 16.25                       | ± | 1.01 | 14.90                       | ± | 2.04 | 7.36                        | ± | 2.22 | 1.42                        | ± | 0.74 |
|                 |              | NO <sub>3</sub> | n                           | = | 3    | n                           | = | 3    | n                           | = | 3    | n                           | = | 3    |
| August 2019     | Maumee Bay   | No Dilution     | 16.33                       | ± | 0.89 | 14.15                       | ± | 1.65 | 8.11                        | ± | 3.70 | 2.38                        | ± | 1.11 |
|                 |              | NH <sub>4</sub> | n                           | = | 3    | n                           | = | 3    | n                           | = | 3    | n                           | = | 3    |
| August 2019     | Maumee Bay   | No Dilution     | 17.49                       | ± | 1.52 | 16.21                       | ± | 2.84 | 5.66                        | ± | 1.05 | 2.61                        | ± | 1.11 |
|                 |              | Urea            | n                           | = | 3    | n                           | = | 3    | n                           | = | 3    | n                           | = | 3    |
| August 2019     | Maumee Bay   | No Dilution     | 17.38                       | ± | 0.42 | 12.22                       | ± | 0.87 | 6.44                        | ± | 1.48 | 2.82                        | ± | 1.74 |
|                 |              | PO <sub>4</sub> | n                           | = | 3    | n                           | = | 3    | n                           | = | 3    | n                           | = | 3    |

| Sampling Period | Bay        | Treatment       | T0 ( $\mu\text{g L}^{-1}$ ) |   |      | T1 ( $\mu\text{g L}^{-1}$ ) |   |      | T2 ( $\mu\text{g L}^{-1}$ ) |   |      | T3 ( $\mu\text{g L}^{-1}$ ) |   |      |
|-----------------|------------|-----------------|-----------------------------|---|------|-----------------------------|---|------|-----------------------------|---|------|-----------------------------|---|------|
| August 2019     | Maumee Bay | No Dilution     | 16.75                       | ± | 1.16 | 11.44                       | ± | 0.33 | 5.09                        | ± | 0.42 | 3.32                        | ± | 1.19 |
|                 |            | N+P             | n                           | = | 3    | n                           | = | 3    | n                           | = | 3    | n                           | = | 3    |
| August 2019     | Maumee Bay | 40% Dilution    | 11.47                       | ± | 2.46 | 10.65                       | ± | 1.89 | 10.29                       | ± | 1.61 | 3.34                        | ± | 1.16 |
|                 |            | Control         | n                           | = | 3    | n                           | = | 3    | n                           | = | 3    | n                           | = | 3    |
| August 2019     | Maumee Bay | 40% Dilution    | 12.40                       | ± | 0.99 | 8.66                        | ± | 0.63 | 8.83                        | ± | 1.57 | 3.37                        | ± | 1.01 |
|                 |            | NO <sub>3</sub> | n                           | = | 3    | n                           | = | 3    | n                           | = | 3    | n                           | = | 3    |
| August 2019     | Maumee Bay | 40% Dilution    | 11.71                       | ± | 1.85 | 11.16                       | ± | 1.91 | 8.79                        | ± | 1.80 | 2.75                        | ± | 0.56 |
|                 |            | NH <sub>4</sub> | n                           | = | 3    | n                           | = | 3    | n                           | = | 3    | n                           | = | 3    |
| August 2019     | Maumee Bay | 40% Dilution    | 8.76                        | ± | 1.54 | 10.06                       | ± | 1.37 | 8.47                        | ± | 1.26 | 1.48                        | ± | 0.61 |
|                 |            | Urea            | n                           | = | 3    | n                           | = | 3    | n                           | = | 3    | n                           | = | 3    |
| August 2019     | Maumee Bay | 40% Dilution    | 8.41                        | ± | 0.87 | 12.12                       | ± | 1.26 | 8.65                        | ± | 0.64 | 4.57                        | ± | 1.66 |
|                 |            | PO <sub>4</sub> | n                           | = | 3    | n                           | = | 3    | n                           | = | 3    | n                           | = | 3    |
| August 2019     | Maumee Bay | 40% Dilution    | 7.76                        | ± | 1.02 | 11.83                       | ± | 0.23 | 8.20                        | ± | 0.88 | 3.28                        | ± | 0.66 |
|                 |            | N+P             | n                           | = | 3    | n                           | = | 3    | n                           | = | 3    | n                           | = | 3    |



**Table S4.** Biomass-normalized microcystin data from the experiment.

| Sampling Period | Bay          | Treatment       | T0 ( $\mu\text{g microcystin } \mu\text{g chlorophyll a}^{-1}$ ) |   |       | T1 ( $\mu\text{g microcystin } \mu\text{g chlorophyll a}^{-1}$ ) |   |       | T2 ( $\mu\text{g microcystin } \mu\text{g chlorophyll a}^{-1}$ ) |   |       | T3 ( $\mu\text{g microcystin } \mu\text{g chlorophyll a}^{-1}$ ) |   |       |
|-----------------|--------------|-----------------|------------------------------------------------------------------|---|-------|------------------------------------------------------------------|---|-------|------------------------------------------------------------------|---|-------|------------------------------------------------------------------|---|-------|
| June 2019       | Sandusky Bay | No Dilution     | 0.004                                                            | ± | 0.040 | 0.006                                                            | ± | 0.009 | 0.005                                                            | ± | 0.014 | 0.004                                                            | ± | 0.015 |
|                 |              | Control         | n                                                                | = | 3     | n                                                                | = | 3     | n                                                                | = | 3     | n                                                                | = | 3     |
| June 2019       | Sandusky Bay | No Dilution     | 0.006                                                            | ± | 0.009 | 0.006                                                            | ± | 0.036 | 0.006                                                            | ± | 0.009 | 0.005                                                            | ± | 0.020 |
|                 |              | NO <sub>3</sub> | n                                                                | = | 2     | n                                                                | = | 3     | n                                                                | = | 3     | n                                                                | = | 3     |
| June 2019       | Sandusky Bay | No Dilution     | 0.006                                                            | a | 0.005 | 0.006                                                            | ± | 0.015 | 0.006                                                            | ± | 0.006 | 0.005                                                            | ± | 0.008 |
|                 |              | NH <sub>4</sub> | n                                                                | = | 3     | n                                                                | = | 3     | n                                                                | = | 3     | n                                                                | = | 3     |
| June 2019       | Sandusky Bay | No Dilution     | 0.007                                                            | ± | 0.047 | 0.008                                                            | ± | 0.034 | 0.005                                                            | ± | 0.003 | 0.005                                                            | ± | 0.001 |
|                 |              | PO <sub>4</sub> | n                                                                | = | 3     | n                                                                | = | 3     | n                                                                | = | 3     | n                                                                | = | 3     |
| June 2019       | Sandusky Bay | No Dilution     | 0.007                                                            | ± | 0.032 | 0.007                                                            | ± | 0.014 | 0.006                                                            | ± | 0.025 | 0.005                                                            | ± | 0.002 |
|                 |              | N+P             | n                                                                | = | 2     | n                                                                | = | 3     | n                                                                | = | 3     | n                                                                | = | 3     |
| June 2019       | Sandusky Bay | 40% Dilution    | 0.009                                                            | ± | 0.142 | 0.006                                                            | ± | 0.069 | 0.005                                                            | ± | 0.004 | 0.003                                                            | ± | 0.028 |
|                 |              | Control         | n                                                                | = | 2     | n                                                                | = | 2     | n                                                                | = | 2     | n                                                                | = | 3     |
| June 2019       | Sandusky Bay | 40% Dilution    | 0.008                                                            | ± | 0.034 | 0.007                                                            | ± | 0.019 | 0.005                                                            | ± | 0.110 | 0.005                                                            | ± | 0.001 |
|                 |              | NO <sub>3</sub> | n                                                                | = | 2     | n                                                                | = | 3     | n                                                                | = | 3     | n                                                                | = | 2     |
| June 2019       | Sandusky Bay | 40% Dilution    | 0.007                                                            | ± | 0.00  | 0.007                                                            | ± | 0.022 | 0.007                                                            | ± | 0.009 | 0.004                                                            | ± | 0.015 |
|                 |              | NH <sub>4</sub> | n                                                                | = | 1     | n                                                                | = | 3     | n                                                                | = | 3     | n                                                                | = | 3     |
| June 2019       | Sandusky Bay | 40% Dilution    | 0.013                                                            | ± | 0.00  | 0.007                                                            | ± | 0.022 | 0.006                                                            | ± | 0.004 | 0.004                                                            | ± | 0.021 |
|                 |              | PO <sub>4</sub> | n                                                                | = | 1     | n                                                                | = | 3     | n                                                                | = | 2     | n                                                                | = | 2     |
| June 2019       | Sandusky Bay | 40% Dilution    | 0.009                                                            | ± | 0.00  | 0.008                                                            | ± | 0.007 | 0.006                                                            | ± | 0.011 | 0.004                                                            | ± | 0.018 |
|                 |              | N+P             | n                                                                | = | 1     | n                                                                | = | 3     | n                                                                | = | 3     | n                                                                | = | 3     |
| August 2019     | Maumee Bay   | No Dilution     | 0.042                                                            | ± | 0.025 | 0.045                                                            | ± | 0.055 | 0.044                                                            | ± | 0.104 | 0.029                                                            | ± | 0.076 |
|                 |              | Control         | n                                                                | = | 3     | n                                                                | = | 3     | n                                                                | = | 3     | n                                                                | = | 3     |
| August 2019     | Maumee Bay   | No Dilution     | 0.040                                                            | ± | 0.029 | 0.053                                                            | ± | 0.093 | 0.038                                                            | ± | 0.088 | 0.018                                                            | ± | 0.075 |
|                 |              | NO <sub>3</sub> | n                                                                | = | 3     | n                                                                | = | 3     | n                                                                | = | 3     | n                                                                | = | 3     |
| August 2019     | Maumee Bay   | No Dilution     | 0.042                                                            | ± | 0.017 | 0.041                                                            | ± | 0.037 | 0.040                                                            | ± | 0.083 | 0.028                                                            | ± | 0.065 |
|                 |              | NH <sub>4</sub> | n                                                                | = | 3     | n                                                                | = | 3     | n                                                                | = | 3     | n                                                                | = | 3     |
| August 2019     | Maumee Bay   | No Dilution     | 0.046                                                            | ± | 0.103 | 0.051                                                            | ± | 0.157 | 0.035                                                            | ± | 0.035 | 0.037                                                            | ± | 0.097 |
|                 |              | Urea            | n                                                                | = | 3     | n                                                                | = | 3     | n                                                                | = | 3     | n                                                                | = | 3     |
| August 2019     | Maumee Bay   | No Dilution     | 0.044                                                            | ± | 0.037 | 0.037                                                            | ± | 0.588 | 0.035                                                            | ± | 0.122 | 0.030                                                            | ± | 0.108 |
|                 |              | PO <sub>4</sub> | n                                                                | = | 3     | n                                                                | = | 3     | n                                                                | = | 3     | n                                                                | = | 3     |

| Sampling Period | Bay        | Treatment                       | T0 ( $\mu\text{g microcystin } \mu\text{g chlorophyll a}^{-1}$ ) |            |            | T1 ( $\mu\text{g microcystin } \mu\text{g chlorophyll a}^{-1}$ ) |            |            | T2 ( $\mu\text{g microcystin } \mu\text{g chlorophyll a}^{-1}$ ) |            |            | T3 ( $\mu\text{g microcystin } \mu\text{g chlorophyll a}^{-1}$ ) |            |            |
|-----------------|------------|---------------------------------|------------------------------------------------------------------|------------|------------|------------------------------------------------------------------|------------|------------|------------------------------------------------------------------|------------|------------|------------------------------------------------------------------|------------|------------|
| August 2019     | Maumee Bay | No Dilution<br>N+P              | 0.043<br>n                                                       | $\pm$<br>= | 0.085<br>3 | 0.032<br>n                                                       | $\pm$<br>= | 0.018<br>3 | 0.023<br>n                                                       | $\pm$<br>= | 0.036<br>3 | 0.031<br>n                                                       | $\pm$<br>= | 0.119<br>3 |
| August 2019     | Maumee Bay | 40% Dilution<br>Control         | 0.050<br>n                                                       | $\pm$<br>= | 0.231<br>3 | 0.043<br>n                                                       | $\pm$<br>= | 0.055<br>3 | 0.062<br>n                                                       | $\pm$<br>= | 0.096<br>3 | 0.031<br>n                                                       | $\pm$<br>= | 0.147<br>3 |
| August 2019     | Maumee Bay | 40% Dilution<br>NO <sub>3</sub> | 0.057<br>n                                                       | $\pm$<br>= | 0.300<br>3 | 0.035<br>n                                                       | $\pm$<br>= | 0.034<br>3 | 0.058<br>n                                                       | $\pm$<br>= | 0.276<br>3 | 0.048<br>n                                                       | $\pm$<br>= | 0.046<br>3 |
| August 2019     | Maumee Bay | 40% Dilution<br>NH <sub>4</sub> | 0.050<br>n                                                       | $\pm$<br>= | 0.556<br>3 | 0.050<br>n                                                       | $\pm$<br>= | 0.076<br>3 | 0.052<br>n                                                       | $\pm$<br>= | 0.260<br>3 | 0.031<br>n                                                       | $\pm$<br>= | 0.101<br>3 |
| August 2019     | Maumee Bay | 40% Dilution<br>Urea            | 0.036<br>n                                                       | $\pm$<br>= | 1.415<br>3 | 0.047<br>n                                                       | $\pm$<br>= | 0.330<br>3 | 0.061<br>n                                                       | $\pm$<br>= | 0.051<br>3 | 0.029<br>n                                                       | $\pm$<br>= | 0.082<br>3 |
| August 2019     | Maumee Bay | 40% Dilution<br>PO <sub>4</sub> | 0.039<br>n                                                       | $\pm$<br>= | 0.186<br>3 | 0.057<br>n                                                       | $\pm$<br>= | 0.153<br>3 | 0.054<br>n                                                       | $\pm$<br>= | 0.088<br>3 | 0.045<br>n                                                       | $\pm$<br>= | 0.118<br>3 |
| August 2019     | Maumee Bay | 40% Dilution<br>N+P             | 0.033<br>n                                                       | $\pm$<br>= | 0.132<br>3 | 0.055<br>n                                                       | $\pm$<br>= | 0.019<br>3 | 0.057<br>n                                                       | $\pm$<br>= | 0.724<br>3 | 0.049<br>n                                                       | $\pm$<br>= | 0.038<br>3 |

Table S5. Microcystin production rates.

| Sampling Period | Bay          | Treatment                    | Production (d <sup>-1</sup> ) |   |       |
|-----------------|--------------|------------------------------|-------------------------------|---|-------|
| June 2019       | Sandusky Bay | No Dilution Control          | 0.252                         | ± | 0.263 |
| June 2019       | Sandusky Bay | No Dilution NO <sub>3</sub>  | 0.166                         | ± | 0.240 |
| June 2019       | Sandusky Bay | No Dilution NH <sub>4</sub>  | 0.170                         | ± | 0.118 |
| June 2019       | Sandusky Bay | No Dilution PO <sub>4</sub>  | 0.150                         | ± | 0.102 |
| June 2019       | Sandusky Bay | No Dilution N+P              | 0.190                         | ± | 0.235 |
| June 2019       | Sandusky Bay | 40% Dilution Control         | 0.024                         | ± | 0.427 |
| June 2019       | Sandusky Bay | 40% Dilution NO <sub>3</sub> | -0.075                        | ± | 0.326 |
| June 2019       | Sandusky Bay | 40% Dilution NH <sub>4</sub> | -0.050                        | ± | 0.422 |
| June 2019       | Sandusky Bay | 40% Dilution PO <sub>4</sub> | -0.140                        | ± | 0.279 |
| June 2019       | Sandusky Bay | 40% Dilution N+P             | -0.079                        | ± | 0.037 |
| August 2019     | Maumee Bay   | No Dilution Control          | -0.623                        | ± | 0.411 |
| August 2019     | Maumee Bay   | No Dilution NO <sub>3</sub>  | -0.812                        | ± | 0.526 |
| August 2019     | Maumee Bay   | No Dilution NH <sub>4</sub>  | -0.642                        | ± | 0.468 |
| August 2019     | Maumee Bay   | No Dilution Urea             | -0.634                        | ± | 0.435 |
| August 2019     | Maumee Bay   | No Dilution PO <sub>4</sub>  | -0.606                        | ± | 0.618 |
| August 2019     | Maumee Bay   | No Dilution N+P              | -0.539                        | ± | 0.365 |
| August 2019     | Maumee Bay   | 40% Dilution Control         | -0.411                        | ± | 0.407 |
| August 2019     | Maumee Bay   | 40% Dilution NO <sub>3</sub> | -0.434                        | ± | 0.309 |
| August 2019     | Maumee Bay   | 40% Dilution NH <sub>4</sub> | -0.483                        | ± | 0.256 |
| August 2019     | Maumee Bay   | 40% Dilution Urea            | -0.592                        | ± | 0.448 |
| August 2019     | Maumee Bay   | 40% Dilution PO <sub>4</sub> | -0.203                        | ± | 0.378 |
| August 2019     | Maumee Bay   | 40% Dilution N+P             | -0.287                        | ± | 0.242 |

**Table S6.** Biomass-normalized microcystin production rates.

| Sampling Period | Bay          | Treatment                    | Production (d <sup>-1</sup> ) |   |       |
|-----------------|--------------|------------------------------|-------------------------------|---|-------|
| June 2019       | Sandusky Bay | No Dilution Control          | 0.005                         | ± | 0.043 |
| June 2019       | Sandusky Bay | No Dilution NO <sub>3</sub>  | -0.067                        | ± | 0.022 |
| June 2019       | Sandusky Bay | No Dilution NH <sub>4</sub>  | -0.084                        | ± | 0.009 |
| June 2019       | Sandusky Bay | No Dilution PO <sub>4</sub>  | -0.100                        | ± | 0.047 |
| June 2019       | Sandusky Bay | No Dilution N+P              | -0.113                        | ± | 0.002 |
| June 2019       | Sandusky Bay | 40% Dilution Control         | -0.200                        | ± | 0.009 |
| June 2019       | Sandusky Bay | 40% Dilution NO <sub>3</sub> | -0.186                        | ± | 0.042 |
| June 2019       | Sandusky Bay | 40% Dilution NH <sub>4</sub> | -0.373                        | ± | 0.142 |
| June 2019       | Sandusky Bay | 40% Dilution PO <sub>4</sub> | -0.249                        | ± | 0.015 |
| June 2019       | Sandusky Bay | 40% Dilution N+P             | -0.382                        | ± | 0.021 |
| August 2019     | Maumee Bay   | No Dilution Control          | -0.128                        | ± | 0.081 |
| August 2019     | Maumee Bay   | No Dilution NO <sub>3</sub>  | -0.256                        | ± | 0.080 |
| August 2019     | Maumee Bay   | No Dilution NH <sub>4</sub>  | -0.136                        | ± | 0.067 |
| August 2019     | Maumee Bay   | No Dilution Urea             | -0.072                        | ± | 0.141 |
| August 2019     | Maumee Bay   | No Dilution PO <sub>4</sub>  | -0.135                        | ± | 0.115 |
| August 2019     | Maumee Bay   | No Dilution N+P              | -0.108                        | ± | 0.146 |
| August 2019     | Maumee Bay   | 40% Dilution Control         | -0.159                        | ± | 0.274 |
| August 2019     | Maumee Bay   | 40% Dilution NO <sub>3</sub> | -0.054                        | ± | 0.303 |
| August 2019     | Maumee Bay   | 40% Dilution NH <sub>4</sub> | -0.155                        | ± | 0.565 |
| August 2019     | Maumee Bay   | 40% Dilution Urea            | -0.071                        | ± | 1.418 |
| August 2019     | Maumee Bay   | 40% Dilution PO <sub>4</sub> | 0.046                         | ± | 0.220 |
| August 2019     | Maumee Bay   | 40% Dilution N+P             | 0.133                         | ± | 0.138 |

Table S7. Anatoxin data from the experiment.

| Sampling Period | Bay      | Treatment       | T0 ( $\mu\text{g L}^{-1}$ ) |   | T1 ( $\mu\text{g L}^{-1}$ ) |       | T2 ( $\mu\text{g L}^{-1}$ ) |      | T3 ( $\mu\text{g L}^{-1}$ ) |   |      |      |   |      |
|-----------------|----------|-----------------|-----------------------------|---|-----------------------------|-------|-----------------------------|------|-----------------------------|---|------|------|---|------|
| June 2019       | Sandusky | No Dilution     | 0.05                        | ± | 0.04                        | 0.04  | ±                           | 0.01 | 0.08                        | ± | 0.05 | 0.25 | ± | 0.06 |
|                 | Bay      | Control         | n                           | = | 3                           | n     | =                           | 3    | n                           | = | 3    | n    | = | 3    |
| June 2019       | Sandusky | No Dilution     | 0.02                        | ± | 0.02                        | 0.02  | ±                           | 0.01 | 0.11                        | ± | 0.07 | 0.42 | ± | 0.12 |
|                 | Bay      | NO <sub>3</sub> | n                           | = | 3                           | n     | =                           | 3    | n                           | = | 3    | n    | = | 3    |
| June 2019       | Sandusky | No Dilution     | 0.02                        | ± | 0.03                        | 0.03  | ±                           | 0.01 | 0.07                        | ± | 0.04 | 0.29 | ± | 0.08 |
|                 | Bay      | NH <sub>4</sub> | n                           | = | 2                           | n     | =                           | 3    | n                           | = | 3    | n    | = | 3    |
| June 2019       | Sandusky | No Dilution     | 0.02                        | ± | 0.03                        | 0.03  | ±                           | 0.01 | 0.18                        | ± | 0.04 | 0.39 | ± | 0.06 |
|                 | Bay      | PO <sub>4</sub> | n                           | = | 3                           | n     | =                           | 3    | n                           | = | 3    | n    | = | 3    |
| June 2019       | Sandusky | No Dilution     | 0.03                        | ± | 0.04                        | 0.04  | ±                           | 0.03 | 0.13                        | ± | 0.09 | 0.46 | ± | 0.17 |
|                 | Bay      | N+P             | n                           | = | 2                           | n     | =                           | 2    | n                           | = | 3    | n    | = | 3    |
| June 2019       | Sandusky | 40% Dilution    | 0.03                        | ± | 0.03                        | 0.01  | ±                           | 0.01 | 0.09                        | ± | 0.06 | 0.22 | ± | 0.12 |
|                 | Bay      | Control         | n                           | = | 2                           | n     | =                           | 3    | n                           | = | 2    | n    | = | 3    |
| June 2019       | Sandusky | 40% Dilution    | 0.02                        | ± | 0.03                        | 0.02  | ±                           | 0.02 | 0.05                        | ± | 0.04 | 0.24 | ± | 0.02 |
|                 | Bay      | NO <sub>3</sub> | n                           | = | 2                           | n     | =                           | 2    | n                           | = | 3    | n    | = | 2    |
| June 2019       | Sandusky | 40% Dilution    | 0.02                        | ± | 0.00                        | 0.02  | ±                           | 0.01 | 0.06                        | ± | 0.03 | 0.17 | ± | 0.01 |
|                 | Bay      | NH <sub>4</sub> | n                           | = | 1                           | n     | =                           | 3    | n                           | = | 3    | n    | = | 3    |
| June 2019       | Sandusky | 40% Dilution    | 0.02                        | ± | 0.02                        | 0.02  | ±                           | 0.00 | 0.04                        | ± | 0.03 | 0.16 | ± | 0.04 |
|                 | Bay      | PO <sub>4</sub> | n                           | = | 3                           | n     | =                           | 2    | n                           | = | 3    | n    | = | 3    |
| June 2019       | Sandusky | 40% Dilution    |                             |   |                             | 0.03  | ±                           | 0.03 | 0.14                        | ± | 0.10 | 0.19 | ± | 0.09 |
|                 | Bay      | N+P             |                             |   | NaN <sup>1</sup>            | n     | =                           | 3    | n                           | = | 3    | n    | = | 3    |
| August 2019     | Sandusky | No Dilution     | 18.06                       | ± | 1.10                        | 14.91 | ±                           | 1.28 | 0.70                        | ± | 0.11 | 1.00 | ± | 0.13 |
|                 | Bay      | Control         | n                           | = | 3                           | n     | =                           | 3    | n                           | = | 3    | n    | = | 3    |
| August 2019     | Sandusky | No Dilution     | 16.25                       | ± | 1.01                        | 14.90 | ±                           | 2.04 | 4.43                        | ± | 0.07 | 7.99 | ± | 0.51 |
|                 | Bay      | NO <sub>3</sub> | n                           | = | 3                           | n     | =                           | 3    | n                           | = | 3    | n    | = | 3    |
| August 2019     | Sandusky | No Dilution     | 16.33                       | ± | 0.89                        | 14.15 | ±                           | 1.65 | 2.91                        | ± | 0.35 | 5.10 | ± | 0.25 |
|                 | Bay      | NH <sub>4</sub> | n                           | = | 3                           | n     | =                           | 3    | n                           | = | 3    | n    | = | 3    |
| August 2019     | Sandusky | No Dilution     | 17.49                       | ± | 1.52                        | 16.21 | ±                           | 2.84 | 3.78                        | ± | 0.24 | 5.19 | ± | 0.21 |
|                 | Bay      | Urea            | n                           | = | 3                           | n     | =                           | 3    | n                           | = | 3    | n    | = | 3    |
| August 2019     | Sandusky | No Dilution     | 17.38                       | ± | 0.42                        | 12.22 | ±                           | 0.87 | 0.76                        | ± | 0.08 | 1.01 | ± | 0.06 |
|                 | Bay      | PO <sub>4</sub> | n                           | = | 3                           | n     | =                           | 3    | n                           | = | 3    | n    | = | 3    |

| Sampling Period | Bay      | Treatment       | T0 ( $\mu\text{g L}^{-1}$ ) |   | T1 ( $\mu\text{g L}^{-1}$ ) |       |   | T2 ( $\mu\text{g L}^{-1}$ ) |      |   | T3 ( $\mu\text{g L}^{-1}$ ) |      |   |      |
|-----------------|----------|-----------------|-----------------------------|---|-----------------------------|-------|---|-----------------------------|------|---|-----------------------------|------|---|------|
| August 2019     | Sandusky | No Dilution     | 16.75                       | ± | 1.16                        | 11.44 | ± | 0.33                        | 2.19 | ± | 0.42                        | 2.81 | ± | 0.29 |
|                 | Bay      | N+P             | n                           | = | 3                           | n     | = | 3                           | n    | = | 3                           | n    | = | 3    |
| August 2019     | Sandusky | 40% Dilution    | 11.47                       | ± | 2.46                        | 10.65 | ± | 1.89                        | 0.52 | ± | 0.18                        | 0.43 | ± | 0.24 |
|                 | Bay      | Control         | n                           | = | 3                           | n     | = | 3                           | n    | = | 3                           | n    | = | 3    |
| August 2019     | Sandusky | 40% Dilution    | 12.40                       | ± | 0.99                        | 8.66  | ± | 0.63                        | 2.82 | ± | 0.15                        | 4.54 | ± | 0.34 |
|                 | Bay      | NO <sub>3</sub> | n                           | = | 3                           | n     | = | 3                           | n    | = | 3                           | n    | = | 3    |
| August 2019     | Sandusky | 40% Dilution    | 11.71                       | ± | 1.85                        | 11.16 | ± | 1.91                        | 1.49 | ± | 0.30                        | 2.71 | ± | 0.49 |
|                 | Bay      | NH <sub>4</sub> | n                           | = | 3                           | n     | = | 3                           | n    | = | 3                           | n    | = | 3    |
| August 2019     | Sandusky | 40% Dilution    | 8.76                        | ± | 1.54                        | 10.06 | ± | 1.37                        | 1.94 | ± | 0.08                        | 2.95 | ± | 0.05 |
|                 | Bay      | Urea            | n                           | = | 3                           | n     | = | 3                           | n    | = | 3                           | n    | = | 3    |
| August 2019     | Sandusky | 40% Dilution    | 8.41                        | ± | 0.87                        | 12.12 | ± | 1.26                        | 0.59 | ± | 0.08                        | 0.45 | ± | 0.19 |
|                 | Bay      | PO <sub>4</sub> | n                           | = | 3                           | n     | = | 3                           | n    | = | 3                           | n    | = | 3    |
| August 2019     | Sandusky | 40% Dilution    | 7.76                        | ± | 1.02                        | 11.83 | ± | 0.23                        | 1.44 | ± | 0.25                        | 2.54 | ± | 0.90 |
|                 | Bay      | N+P             | n                           | = | 3                           | n     | = | 3                           | n    | = | 3                           | n    | = | 3    |

<sup>1</sup> NaN is No data available

Table S8. Biomass-normalized anatoxin data from the experiment.

| Sampling Period | Bay      | Treatment       | T0 ( $\mu\text{g anatoxin } \mu\text{g chlorophyll a}^{-1}$ ) |       |                  | T1 ( $\mu\text{g anatoxin } \mu\text{g chlorophyll a}^{-1}$ ) |       |       | T2 ( $\mu\text{g anatoxin } \mu\text{g chlorophyll a}^{-1}$ ) |       |       | T3 ( $\mu\text{g anatoxin } \mu\text{g chlorophyll a}^{-1}$ ) |       |       |
|-----------------|----------|-----------------|---------------------------------------------------------------|-------|------------------|---------------------------------------------------------------|-------|-------|---------------------------------------------------------------|-------|-------|---------------------------------------------------------------|-------|-------|
| June 2019       | Sandusky | No Dilution     | 0.002                                                         | $\pm$ | 0.031            | 0.001                                                         | $\pm$ | 0.005 | 0.002                                                         | $\pm$ | 0.013 | 0.004                                                         | $\pm$ | 0.019 |
|                 | Bay      | Control         | n                                                             | =     | 3                | n                                                             | =     | 3     | n                                                             | =     | 3     | n                                                             | =     | 3     |
| June 2019       | Sandusky | No Dilution     | 0.001                                                         | $\pm$ | 0.014            | 0.001                                                         | $\pm$ | 0.009 | 0.003                                                         | $\pm$ | 0.014 | 0.007                                                         | $\pm$ | 0.035 |
|                 | Bay      | NO <sub>3</sub> | n                                                             | =     | 3                | n                                                             | =     | 3     | n                                                             | =     | 3     | n                                                             | =     | 3     |
| June 2019       | Sandusky | No Dilution     | 0.001                                                         | $\pm$ | 0.016            | 0.001                                                         | $\pm$ | 0.004 | 0.002                                                         | $\pm$ | 0.014 | 0.005                                                         | $\pm$ | 0.021 |
|                 | Bay      | NH <sub>4</sub> | n                                                             | =     | 2                | n                                                             | =     | 3     | n                                                             | =     | 3     | n                                                             | =     | 3     |
| June 2019       | Sandusky | No Dilution     | 0.001                                                         | $\pm$ | 0.056            | 0.001                                                         | $\pm$ | 0.006 | 0.004                                                         | $\pm$ | 0.008 | 0.006                                                         | $\pm$ | 0.007 |
|                 | Bay      | PO <sub>4</sub> | n                                                             | =     | 3                | n                                                             | =     | 3     | n                                                             | =     | 3     | n                                                             | =     | 3     |
| June 2019       | Sandusky | No Dilution     | 0.001                                                         | $\pm$ | 0.029            | 0.001                                                         | $\pm$ | 0.008 | 0.003                                                         | $\pm$ | 0.039 | 0.006                                                         | $\pm$ | 0.077 |
|                 | Bay      | N+P             | n                                                             | =     | 2                | n                                                             | =     | 2     | n                                                             | =     | 3     | n                                                             | =     | 3     |
| June 2019       | Sandusky | 40% Dilution    | 0.002                                                         | $\pm$ | 0.046            | 0.001                                                         | $\pm$ | 0.012 | 0.004                                                         | $\pm$ | 0.042 | 0.007                                                         | $\pm$ | 0.045 |
|                 | Bay      | Control         | n                                                             | =     | 2                | n                                                             | =     | 3     | n                                                             | =     | 2     | n                                                             | =     | 3     |
| June 2019       | Sandusky | 40% Dilution    | 0.001                                                         | $\pm$ | 0.080            | 0.001                                                         | $\pm$ | 0.038 | 0.002                                                         | $\pm$ | 0.100 | 0.005                                                         | $\pm$ | 0.001 |
|                 | Bay      | NO <sub>3</sub> | n                                                             | =     | 2                | n                                                             | =     | 2     | n                                                             | =     | 3     | n                                                             | =     | 2     |
| June 2019       | Sandusky | 40% Dilution    | 0.001                                                         | $\pm$ | 0.00             | 0.001                                                         | $\pm$ | 0.005 | 0.002                                                         | $\pm$ | 0.011 | 0.005                                                         | $\pm$ | 0.004 |
|                 | Bay      | NH <sub>4</sub> | n                                                             | =     | 1                | n                                                             | =     | 3     | n                                                             | =     | 3     | n                                                             | =     | 3     |
| June 2019       | Sandusky | 40% Dilution    | 0.001                                                         | $\pm$ | 0.023            | 0.001                                                         | $\pm$ | 0.003 | 0.002                                                         | $\pm$ | 0.009 | 0.004                                                         | $\pm$ | 0.018 |
|                 | Bay      | PO <sub>4</sub> | n                                                             | =     | 3                | n                                                             | =     | 2     | n                                                             | =     | 3     | n                                                             | =     | 3     |
| June 2019       | Sandusky | 40% Dilution    |                                                               |       | NaN <sup>1</sup> | 0.002                                                         | $\pm$ | 0.024 | 0.006                                                         | $\pm$ | 0.089 | 0.005                                                         | $\pm$ | 0.030 |
|                 | Bay      | N+P             |                                                               |       |                  | n                                                             | =     | 3     | n                                                             | =     | 3     | n                                                             | =     | 3     |
| August 2019     | Sandusky | No Dilution     | 0.009                                                         | $\pm$ | 0.168            | 0.011                                                         | $\pm$ | 0.026 | 0.022                                                         | $\pm$ | 0.032 | 0.033                                                         | $\pm$ | 0.040 |
|                 | Bay      | Control         | n                                                             | =     | 3                | n                                                             | =     | 3     | n                                                             | =     | 3     | n                                                             | =     | 3     |
| August 2019     | Sandusky | No Dilution     | 0.005                                                         | $\pm$ | 0.046            | 0.018                                                         | $\pm$ | 0.111 | 0.036                                                         | $\pm$ | 0.009 | 0.058                                                         | $\pm$ | 0.048 |
|                 | Bay      | NO <sub>3</sub> | n                                                             | =     | 3                | n                                                             | =     | 3     | n                                                             | =     | 3     | n                                                             | =     | 3     |
| August 2019     | Sandusky | No Dilution     | 0.005                                                         | $\pm$ | 0.006            | 0.017                                                         | $\pm$ | 0.024 | 0.025                                                         | $\pm$ | 0.191 | 0.040                                                         | $\pm$ | 0.052 |
|                 | Bay      | NH <sub>4</sub> | n                                                             | =     | 3                | n                                                             | =     | 3     | n                                                             | =     | 3     | n                                                             | =     | 3     |
| August 2019     | Sandusky | No Dilution     | 0.006                                                         | $\pm$ | 0.014            | 0.017                                                         | $\pm$ | 0.028 | 0.033                                                         | $\pm$ | 0.074 | 0.041                                                         | $\pm$ | 0.041 |
|                 | Bay      | Urea            | n                                                             | =     | 3                | n                                                             | =     | 3     | n                                                             | =     | 3     | n                                                             | =     | 3     |
| August 2019     | Sandusky | No Dilution     | 0.007                                                         | $\pm$ | 0.011            | 0.016                                                         | $\pm$ | 0.019 | 0.021                                                         | $\pm$ | 0.027 | 0.028                                                         | $\pm$ | 0.080 |
|                 | Bay      | PO <sub>4</sub> | n                                                             | =     | 3                | n                                                             | =     | 3     | n                                                             | =     | 3     | n                                                             | =     | 3     |

| Sampling Period | Bay      | Treatment       | T0 ( $\mu\text{g anatoxin } \mu\text{g chlorophyll a}^{-1}$ ) |   | T1 ( $\mu\text{g anatoxin } \mu\text{g chlorophyll a}^{-1}$ ) |       | T2 ( $\mu\text{g anatoxin } \mu\text{g chlorophyll a}^{-1}$ ) |       | T3 ( $\mu\text{g anatoxin } \mu\text{g chlorophyll a}^{-1}$ ) |   |       |       |   |       |
|-----------------|----------|-----------------|---------------------------------------------------------------|---|---------------------------------------------------------------|-------|---------------------------------------------------------------|-------|---------------------------------------------------------------|---|-------|-------|---|-------|
| August 2019     | Sandusky | No Dilution     | 0.004                                                         | ± | 0.002                                                         | 0.008 | ±                                                             | 0.012 | 0.014                                                         | ± | 0.127 | 0.014 | ± | 0.091 |
|                 | Bay      | N+P             | n                                                             | = | 3                                                             | n     | =                                                             | 3     | n                                                             | = | 3     | n     | = | 3     |
| August 2019     | Sandusky | 40% Dilution    | 0.005                                                         | ± | 0.026                                                         | 0.009 | ±                                                             | 0.025 | 0.008                                                         | ± | 0.008 | 0.018 | ± | 0.052 |
|                 | Bay      | Control         | n                                                             | = | 3                                                             | n     | =                                                             | 3     | n                                                             | = | 3     | n     | = | 3     |
| August 2019     | Sandusky | 40% Dilution    | 0.006                                                         | ± | 0.012                                                         | 0.011 | ±                                                             | 0.036 | 0.045                                                         | ± | 0.005 | 0.052 | ± | 0.234 |
|                 | Bay      | NO <sub>3</sub> | n                                                             | = | 3                                                             | n     | =                                                             | 3     | n                                                             | = | 3     | n     | = | 3     |
| August 2019     | Sandusky | 40% Dilution    | 0.004                                                         | ± | 0.025                                                         | 0.010 | ±                                                             | 0.004 | 0.022                                                         | ± | 0.046 | 0.034 | ± | 0.114 |
|                 | Bay      | NH <sub>4</sub> | n                                                             | = | 3                                                             | n     | =                                                             | 3     | n                                                             | = | 3     | n     | = | 3     |
| August 2019     | Sandusky | 40% Dilution    | 0.004                                                         | ± | 0.045                                                         | 0.012 | ±                                                             | 0.263 | 0.029                                                         | ± | 0.009 | 0.034 | ± | 0.023 |
|                 | Bay      | Urea            | n                                                             | = | 3                                                             | n     | =                                                             | 3     | n                                                             | = | 3     | n     | = | 3     |
| August 2019     | Sandusky | 40% Dilution    | 0.006                                                         | ± | 0.023                                                         | 0.010 | ±                                                             | 0.096 | 0.025                                                         | ± | 0.043 | 0.017 | ± | 0.129 |
|                 | Bay      | PO <sub>4</sub> | n                                                             | = | 3                                                             | n     | =                                                             | 3     | n                                                             | = | 3     | n     | = | 3     |
| August 2019     | Sandusky | 40% Dilution    | 0.005                                                         | ± | 0.032                                                         | 0.005 | ±                                                             | 0.006 | 0.009                                                         | ± | 0.027 | 0.015 | ± | 0.325 |
|                 | Bay      | N+P             | n                                                             | = | 3                                                             | n     | =                                                             | 3     | n                                                             | = | 3     | n     | = | 3     |

<sup>1</sup> NaN is No data available



**Table S9.** Anatoxin production rates.

| Sampling Period | Bay          | Treatment                    | Production (d <sup>-1</sup> ) |                  |       |
|-----------------|--------------|------------------------------|-------------------------------|------------------|-------|
| June 2019       | Sandusky Bay | No Dilution Control          | 0.516                         | ±                | 0.473 |
| June 2019       | Sandusky Bay | No Dilution NO <sub>3</sub>  | 0.985                         | ±                | 0.767 |
| June 2019       | Sandusky Bay | No Dilution NH <sub>4</sub>  | 0.898                         | ±                | 1.175 |
| June 2019       | Sandusky Bay | No Dilution PO <sub>4</sub>  | 0.970                         | ±                | 1.303 |
| June 2019       | Sandusky Bay | No Dilution N+P              | 0.965                         | ±                | 1.459 |
| June 2019       | Sandusky Bay | 40% Dilution Control         | 0.663                         | ±                | 1.107 |
| June 2019       | Sandusky Bay | 40% Dilution NO <sub>3</sub> | 0.783                         | ±                | 1.416 |
| June 2019       | Sandusky Bay | 40% Dilution NH <sub>4</sub> | 0.800                         | ±                | 0.084 |
| June 2019       | Sandusky Bay | 40% Dilution PO <sub>4</sub> | 0.627                         | ±                | 1.023 |
| June 2019       | Sandusky Bay | 40% Dilution N+P             |                               | NaN <sup>1</sup> |       |
| August 2019     | Sandusky Bay | No Dilution Control          | 0.171                         | ±                | 0.369 |
| August 2019     | Sandusky Bay | No Dilution NO <sub>3</sub>  | 1.084                         | ±                | 0.284 |
| August 2019     | Sandusky Bay | No Dilution NH <sub>4</sub>  | 0.795                         | ±                | 0.192 |
| August 2019     | Sandusky Bay | No Dilution Urea             | 0.800                         | ±                | 0.110 |
| August 2019     | Sandusky Bay | No Dilution PO <sub>4</sub>  | 0.297                         | ±                | 0.070 |
| August 2019     | Sandusky Bay | No Dilution N+P              | 0.717                         | ±                | 0.107 |
| August 2019     | Sandusky Bay | 40% Dilution Control         | 0.204                         | ±                | 0.690 |
| August 2019     | Sandusky Bay | 40% Dilution NO <sub>3</sub> | 1.020                         | ±                | 0.151 |
| August 2019     | Sandusky Bay | 40% Dilution NH <sub>4</sub> | 0.780                         | ±                | 0.255 |
| August 2019     | Sandusky Bay | 40% Dilution Urea            | 0.683                         | ±                | 0.751 |
| August 2019     | Sandusky Bay | 40% Dilution PO <sub>4</sub> | 0.158                         | ±                | 0.535 |
| August 2019     | Sandusky Bay | 40% Dilution N+P             | 0.589                         | ±                | 0.489 |

<sup>1</sup> NaN is No data available**Table S10.** Biomass-normalized anatoxin production rates.

| Sampling Period | Bay          | Treatment                    | Production (d <sup>-1</sup> ) |                  |       |
|-----------------|--------------|------------------------------|-------------------------------|------------------|-------|
| June 2019       | Sandusky Bay | No Dilution Control          | 0.269                         | ±                | 0.036 |
| June 2019       | Sandusky Bay | No Dilution NO <sub>3</sub>  | 0.752                         | ±                | 0.038 |
| June 2019       | Sandusky Bay | No Dilution NH <sub>4</sub>  | 0.645                         | ±                | 0.027 |
| June 2019       | Sandusky Bay | No Dilution PO <sub>4</sub>  | 0.721                         | ±                | 0.057 |
| June 2019       | Sandusky Bay | No Dilution N+P              | 0.663                         | ±                | 0.082 |
| June 2019       | Sandusky Bay | 40% Dilution Control         | 0.453                         | ±                | 0.064 |
| June 2019       | Sandusky Bay | 40% Dilution NO <sub>3</sub> | 0.485                         | ±                | 0.080 |
| June 2019       | Sandusky Bay | 40% Dilution NH <sub>4</sub> | 0.601                         | ±                | 0.004 |
| June 2019       | Sandusky Bay | 40% Dilution PO <sub>4</sub> | 0.385                         | ±                | 0.029 |
| June 2019       | Sandusky Bay | 40% Dilution N+P             |                               | NaN <sup>1</sup> |       |
| August 2019     | Sandusky Bay | No Dilution Control          | 0.423                         | ±                | 0.172 |
| August 2019     | Sandusky Bay | No Dilution NO <sub>3</sub>  | 0.812                         | ±                | 0.067 |
| August 2019     | Sandusky Bay | No Dilution NH <sub>4</sub>  | 0.723                         | ±                | 0.053 |
| August 2019     | Sandusky Bay | No Dilution Urea             | 0.628                         | ±                | 0.043 |
| August 2019     | Sandusky Bay | No Dilution PO <sub>4</sub>  | 0.470                         | ±                | 0.081 |
| August 2019     | Sandusky Bay | No Dilution N+P              | 0.441                         | ±                | 0.091 |
| August 2019     | Sandusky Bay | 40% Dilution Control         | 0.422                         | ±                | 0.058 |
| August 2019     | Sandusky Bay | 40% Dilution NO <sub>3</sub> | 0.749                         | ±                | 0.234 |
| August 2019     | Sandusky Bay | 40% Dilution NH <sub>4</sub> | 0.714                         | ±                | 0.117 |
| August 2019     | Sandusky Bay | 40% Dilution Urea            | 0.703                         | ±                | 0.051 |
| August 2019     | Sandusky Bay | 40% Dilution PO <sub>4</sub> | 0.354                         | ±                | 0.131 |

---

|             |              |                     |       |   |       |
|-------------|--------------|---------------------|-------|---|-------|
| August 2019 | Sandusky Bay | 40% Dilution<br>N+P | 0.375 | ± | 0.327 |
|-------------|--------------|---------------------|-------|---|-------|

---

<sup>1</sup> NaN is No data available

**Table S11.** GPS coordinates of the sampling locations and incubation.

| Site                  | Location                                                                      | GPS Coordinates              |
|-----------------------|-------------------------------------------------------------------------------|------------------------------|
| Maumee Bay Sampling   | Bulkhead across from University of Toledo's Lake Erie Center, Oregon, OH, USA | 41°41'26.25"N, 83°23'52.77"W |
| Sandusky Bay Sampling | Paper District Marina, Sandusky, OH, USA                                      | 41°27'28.00"N, 82°49'36.62"W |
| Sample Incubation     | The Ohio State University Stone Laboratory, Put-In-Bay, OH, USA               | 41°39'28.58"N, 82°49'36.62"W |

**Table S12.** Compounds comprising the major ion solution used in this experiment.

| Compound           | mM   | mg/L  |
|--------------------|------|-------|
| CaCO <sub>3</sub>  | 0.35 | 35.00 |
| NaHCO <sub>3</sub> | 0.2  | 16.80 |
| MgCl <sub>2</sub>  | 0.21 | 42.63 |
| KCl                | 0.04 | 3.00  |
| CaSO <sub>4</sub>  | 0.45 | 77.40 |
| MgCO <sub>3</sub>  | 0.16 | 13.44 |
